# Supplementary material for: Down‐regulation of TIMP2 by HIF‐1α/miR‐210/HIF‐3α regulatory feedback circuit enhances cancer metastasis in hepatocellular carcinoma
Source: PubMed Central journal article supplement — Hepatology. 2016 Apr 30;64(2):473–87. doi: 10.1002/hep.28577 (PMC5074303; doi:10.1002/hep.28577), 2016-04-30

**Supplementary Figure 1. TIMP2 was differentially expressed across a panel of human HCC cell lines.** Immunoblot showing differential expression of TIMP2 in a panel of HCC cell lines.  $\alpha$ -Tubulin was used as the loading control.

**Supplementary Figure 2. Knockdown of TIMP1 did not enhance cell invasion in HCC cells.** Western blot analysis showed successful knockdown of TIMP1. Knockdown of TIMP1 did not result in increased cell invasive abilities. Transwell cell invasion assays of SMMC7721 and PLC/PRF/5 were performed 48 hours after transient transfection of siRNA targeting TIMP1 (siTIMP1) or the non-targeted control siRNA (siNTC). Quantitative data are presented as mean  $\pm$  SD. Statistical significance was determined by t-test. Results were from three independent experiments.

**Supplementary Figure 3.** (A) Schematic diagram for invadopodia assay (B) Representative photo of SMMC-7721 with the F-actin rich region colocalized with gelatin degradation. The main panel shows the en face image generated from a series of xy plane confocal images along the z-axis. The upper and left panels show the x-z and y-z cross-sectional images, respectively. Green: Gelatin; Red: Phalloidin staining for F-actin.

**Supplementary Figure 4. miR-210 was the most consistently upregulated microRNA in hypoxic HCC cells.** (A) qPCR-based miRNA profiling was performed on SMMC-7721, Huh7, and MHCC-97L subject to normoxia (20% O<sub>2</sub>) or hypoxia (0.1% O<sub>2</sub>) using Low Density Array which consisted of 664 unique miRNA molecules (Applied Biosystems). The Venn diagram shows the number of miRNAs  $\geq$  2-fold differentially expressed between these 3 HCC cell lines under hypoxic condition. The small table lists the miRNAs commonly upregulated in the 3 HCC cell lines under hypoxic condition. (B) miR-210 was overexpressed

in hypoxic human HCC cell lines. Individual qPCR analysis of miR-210 was performed on 7 different HCC cell lines subject to normoxia and hypoxia. U6 was used as housekeeping gene for data normalization (\* $P < 0.05$ , \*\* $P < 0.01$ ; \*\*\* $P < 0.001$ ; t-test; mean  $\pm$  S.D.;  $n=3$ ). (C) miR-210 was overexpressed in hypoxic human HCC tissues. H&E section of a representing case consisting of peri-necrotic, CA9-positive regions of primary HCC used for microdissection (N = necrotic region; T = tumorous tissue; HT = hypoxic tumorous livers). U6 was used as housekeeping gene for data normalization. (\*\*\* $P < 0.001$ , t-test; mean  $\pm$  S.D.;  $n=3$  individual cases).

**Supplementary Figure 5. Induction of miR-210 and suppression of TIMP2 mediated by hypoxia were HIF-1 $\alpha$ -dependent.** (A) The protein levels of HIF-1 $\alpha$ , HIF-2 $\alpha$ , TIMP2 and  $\alpha$ -tubulin in shNTC, shHIF-1 $\alpha$ , and shHIF-2 $\alpha$  SMMC-7721 clones are shown. All clones were cultured in 20% O<sub>2</sub> or 0.1% O<sub>2</sub> for 24 hours. B) The miR-210 levels of shNTC, shHIF1 $\alpha$ , and shHIF2 $\alpha$  SMMC-7721 clones were determined by real-time qPCR and normalized to U6. ( $P < 0.001$ , t-test; mean  $\pm$  S.D.;  $n=3$ ). C) Protein levels of TIMP2 in SMMC-7721 and PLC/PRF/5 following transfection of negative control (NC) or miR-210 LNA were shown. D) Ectopic expression of flag-tagged HIF3 ORF in SMMC-7721 was demonstrated by Western blot.  $\alpha$ -Tubulin was used as the loading control.

**Supplementary Figure 6. The enhanced invadopodia formation conferred by TIMP2 suppression in hypoxia was perturbed by miR-210 inhibition.** Invadopodia formation assay of SMMC7721 was performed following transfection with miR-210 LNA inhibitor or non-targeted (NTC) LNA inhibitor under normoxia (20% O<sub>2</sub>) or hypoxia conditions (0.1% O<sub>2</sub>). Cells were scored for gelatin degradation as described in “Experimental Procedures” and a minimum of 200 cells were scored for each experimental group. Quantitative data are

presented as mean  $\pm$  SD and statistical significance was determined by t-test (\* $P$ <0.05; \*\* $P$ <0.01; \*\*\* $P$ <0.001). Results were from three independent experiments.

# Supporting Figure 1

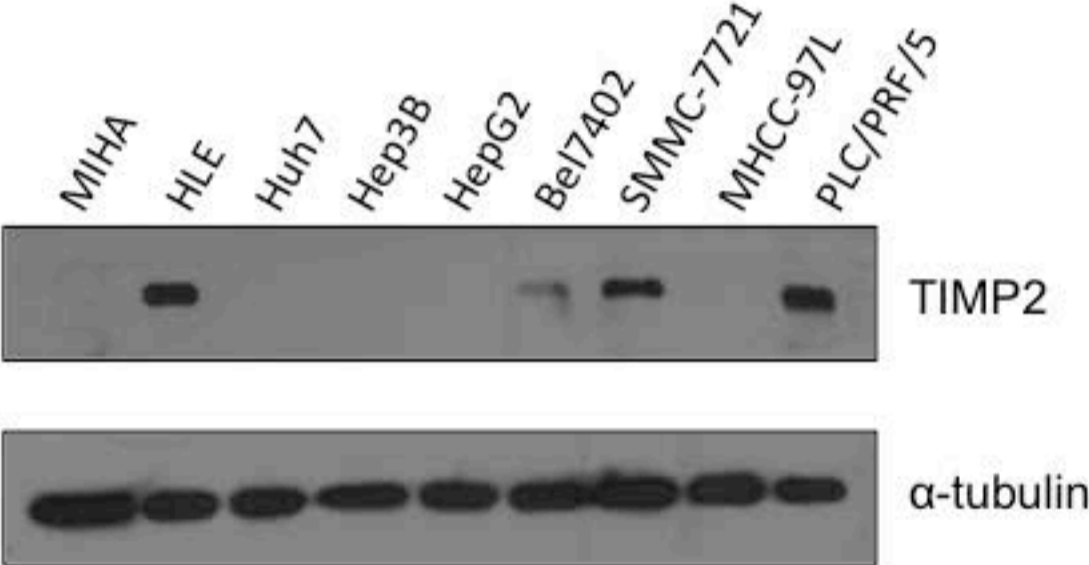

## Supporting Figure 2

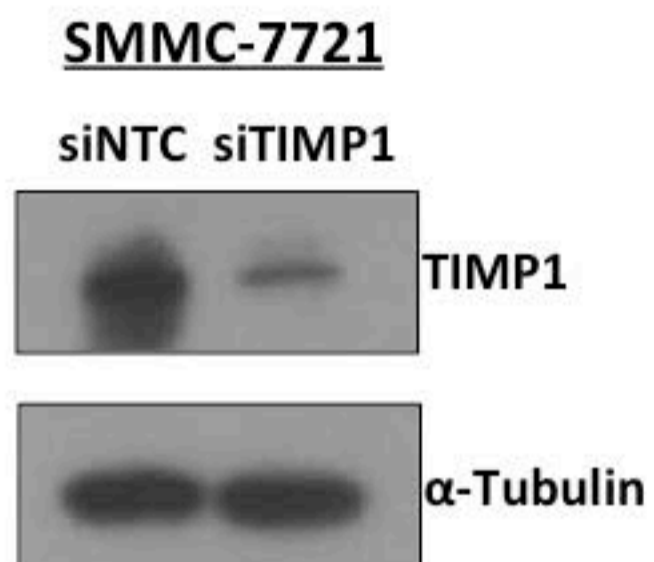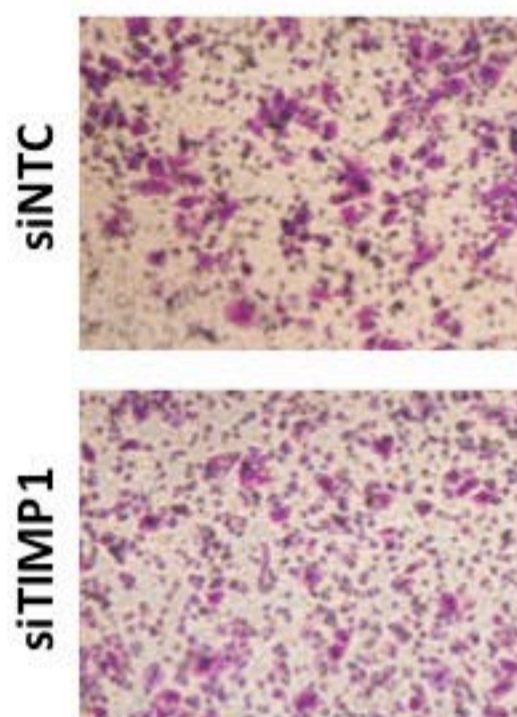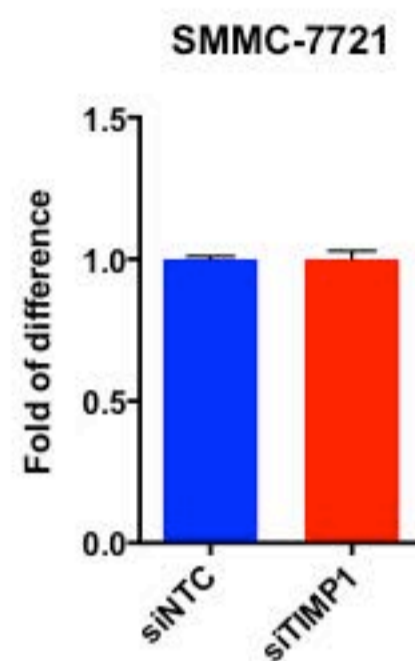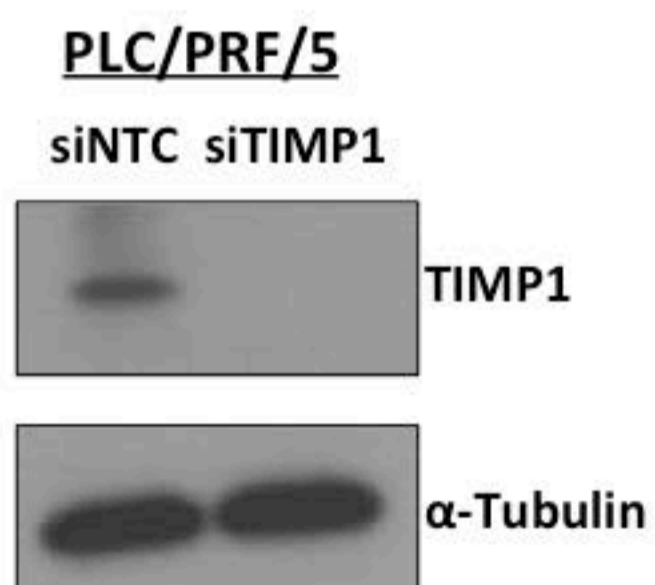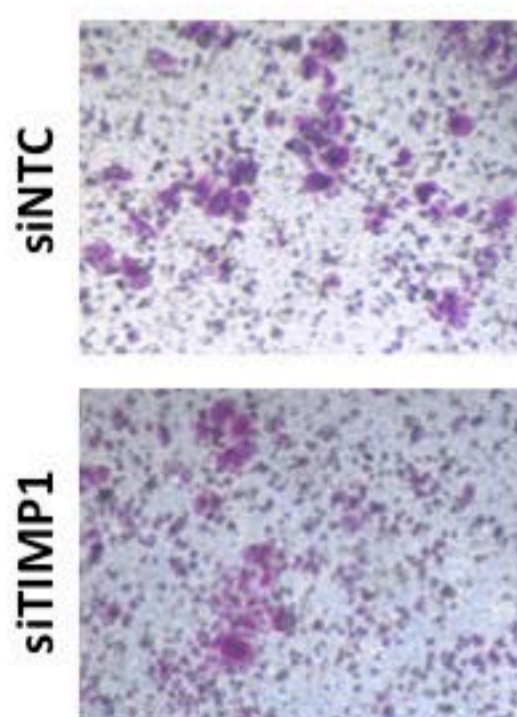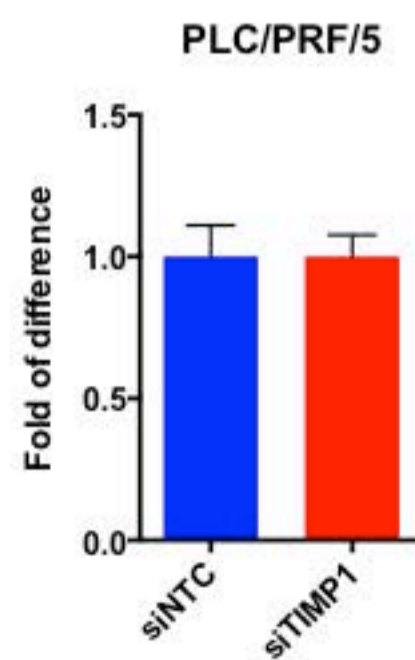

# Supporting Figure 3

A

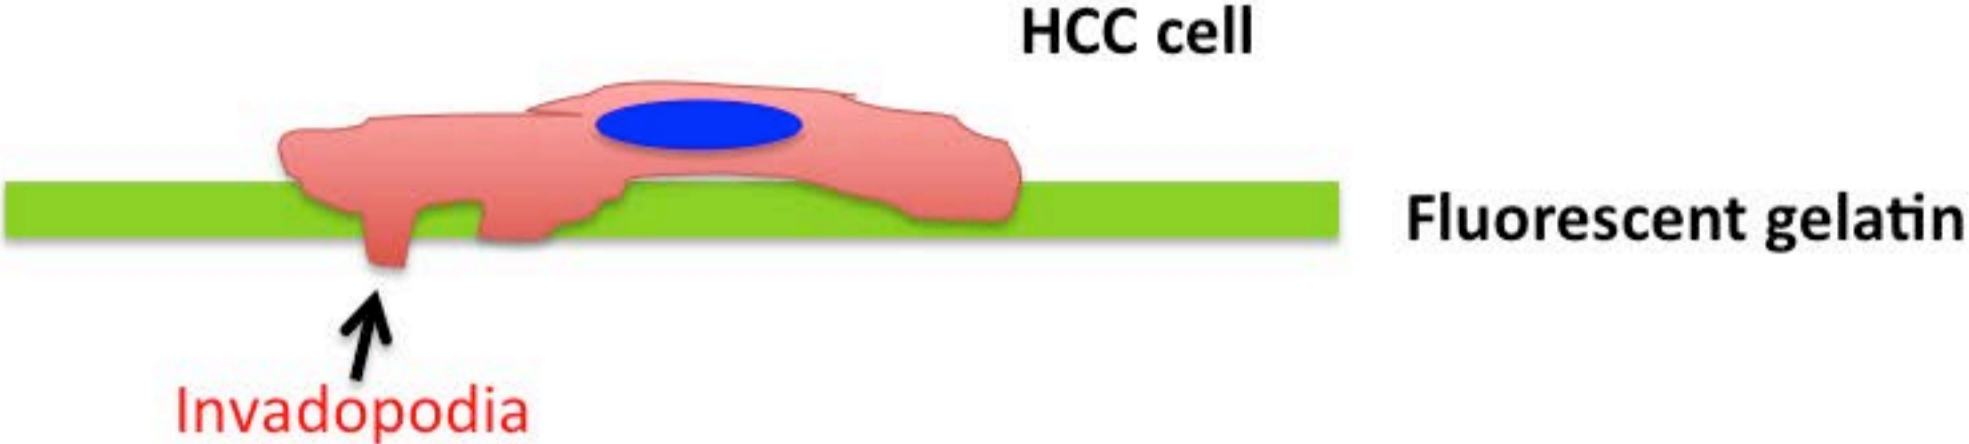

B

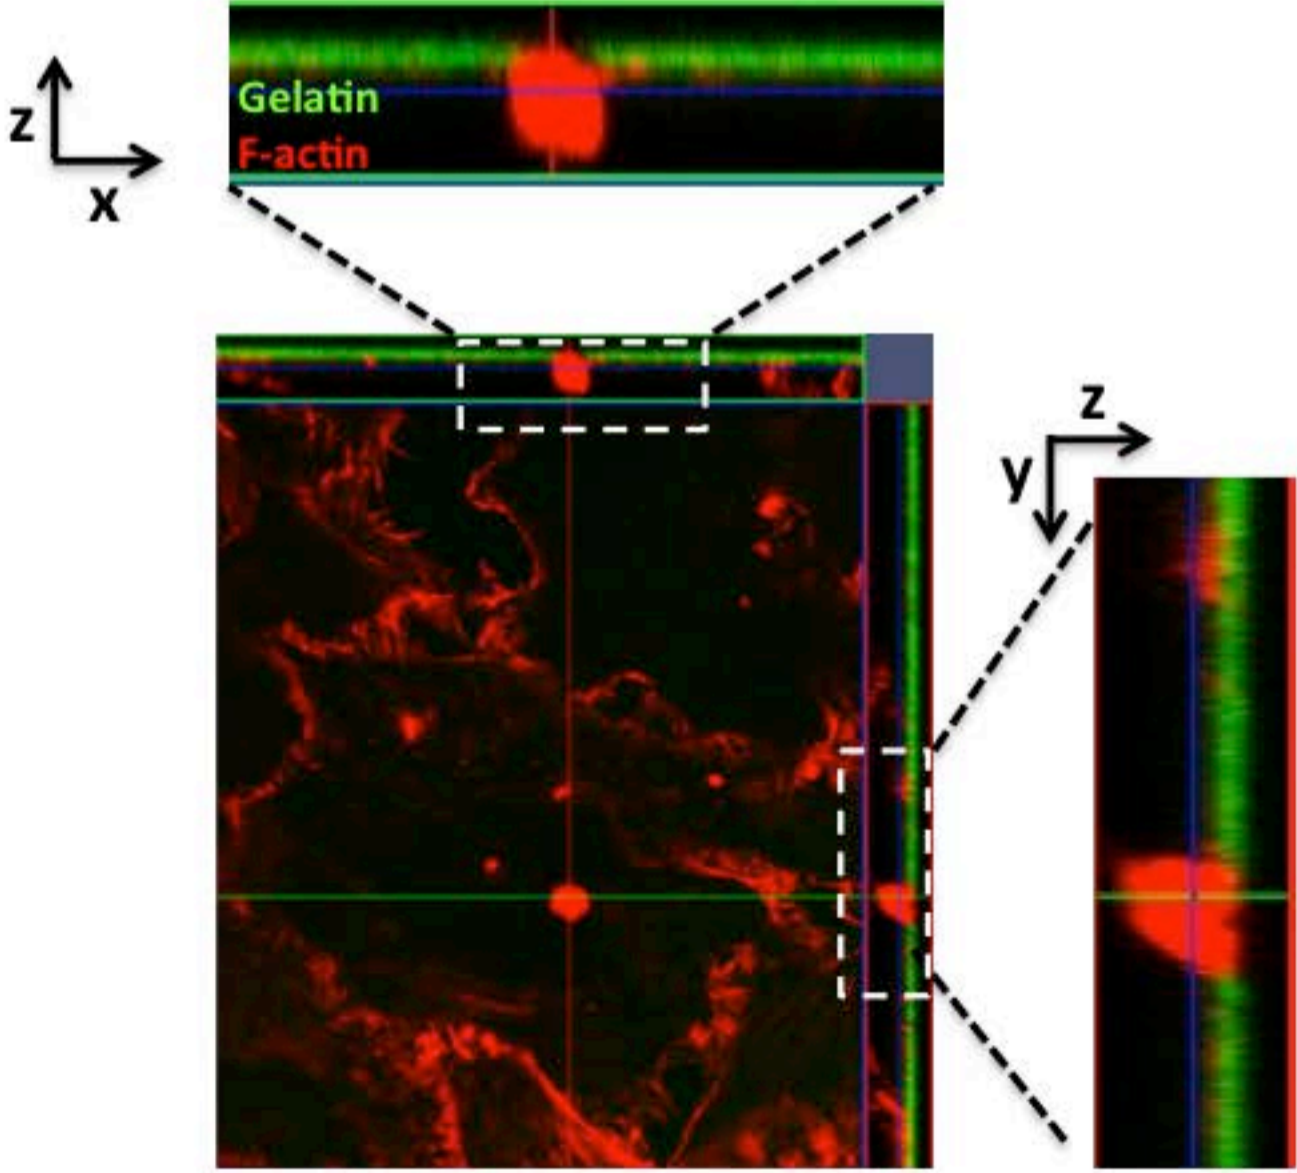

# Supporting Figure 4

**A**

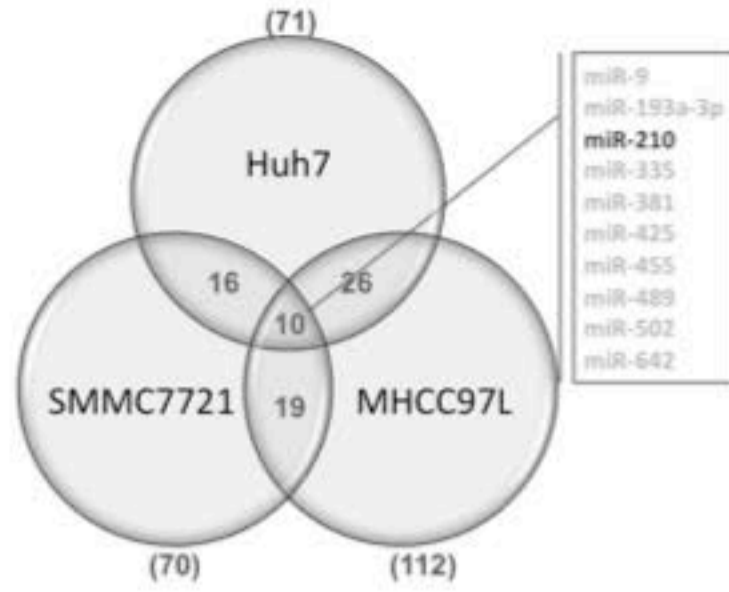

**B**

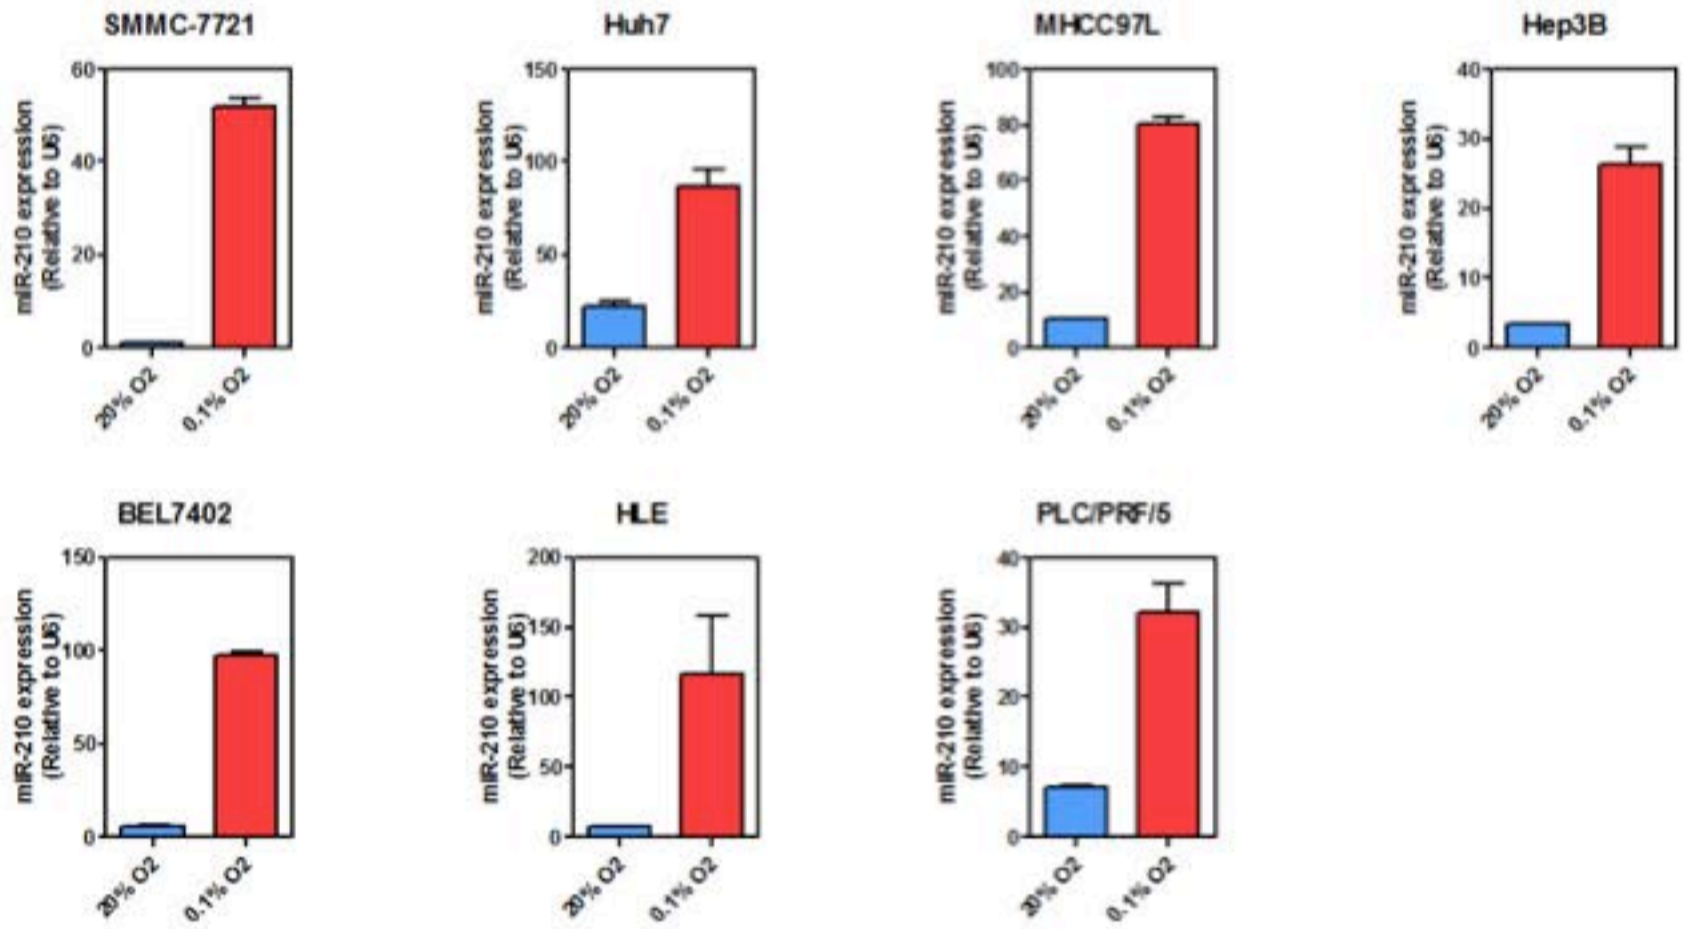

**C**

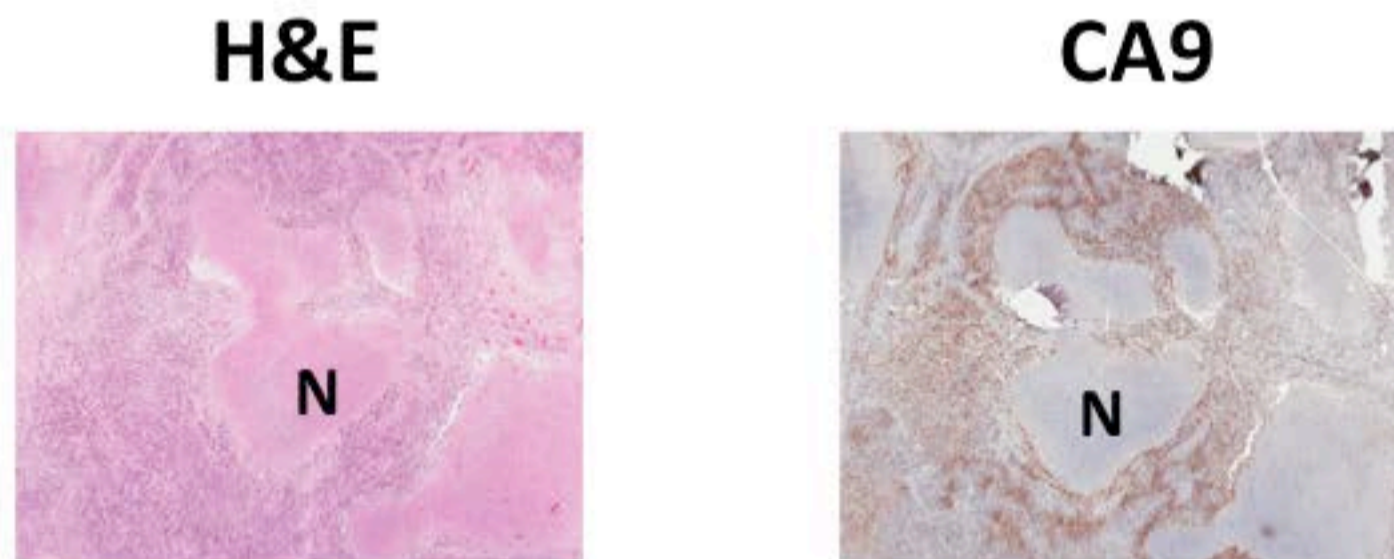

**Microdissected**

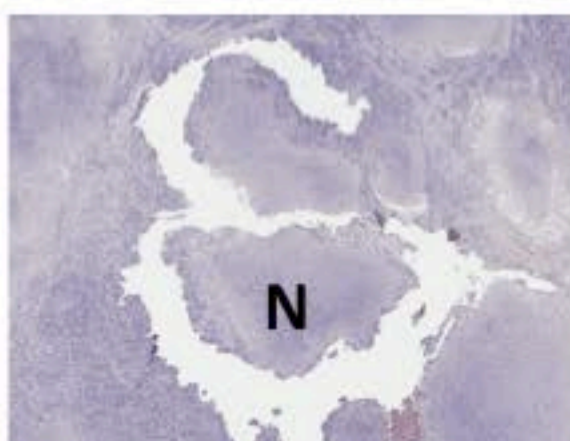

**qPCR**

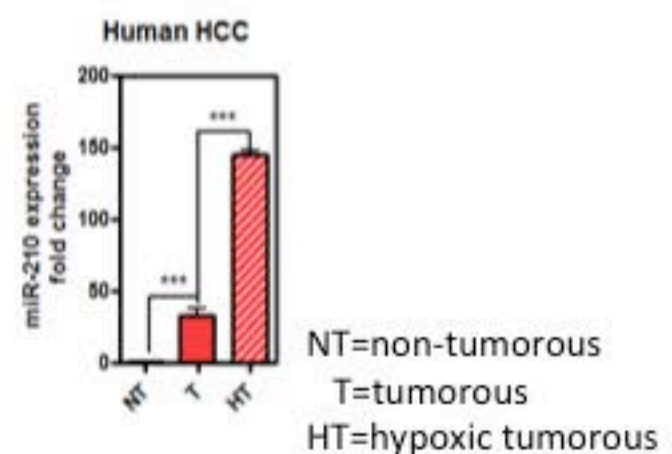

# Supporting Figure 5

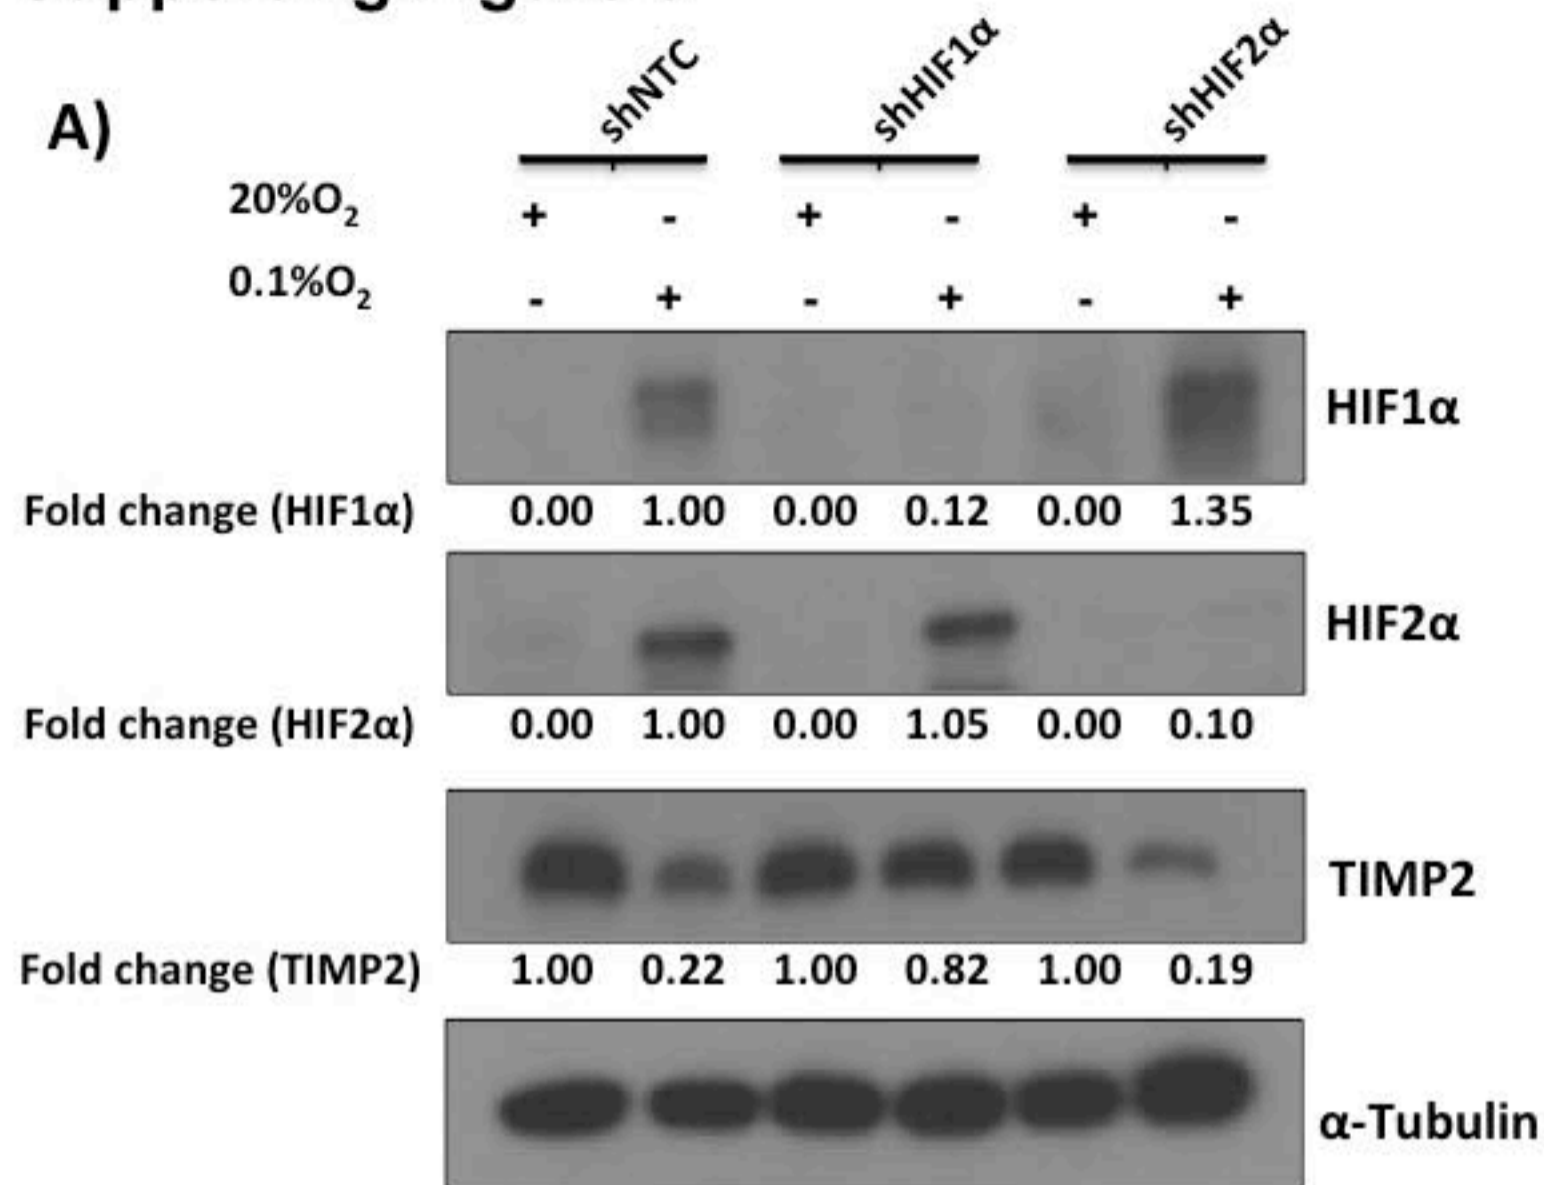

**B)**

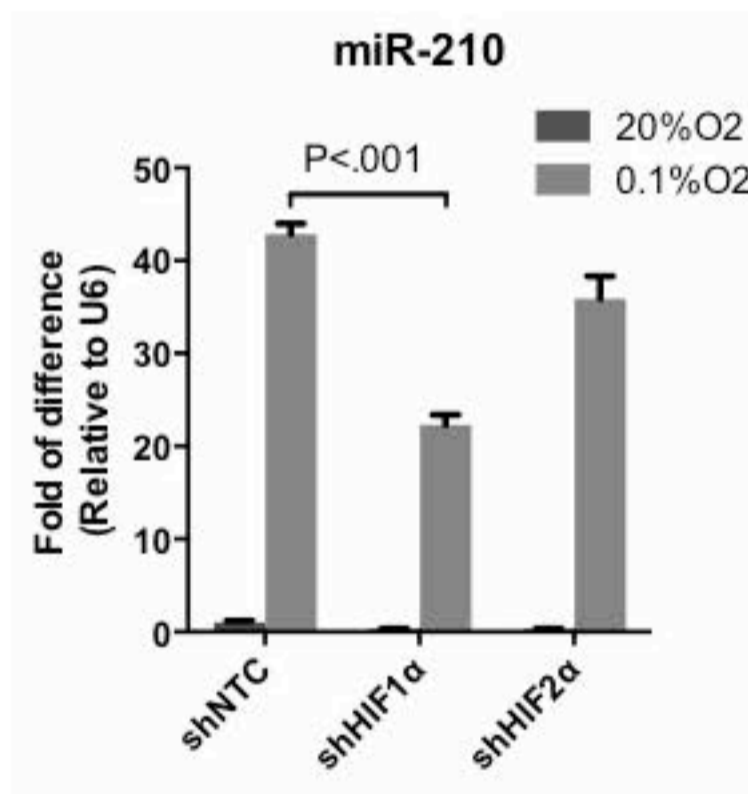

**C)**

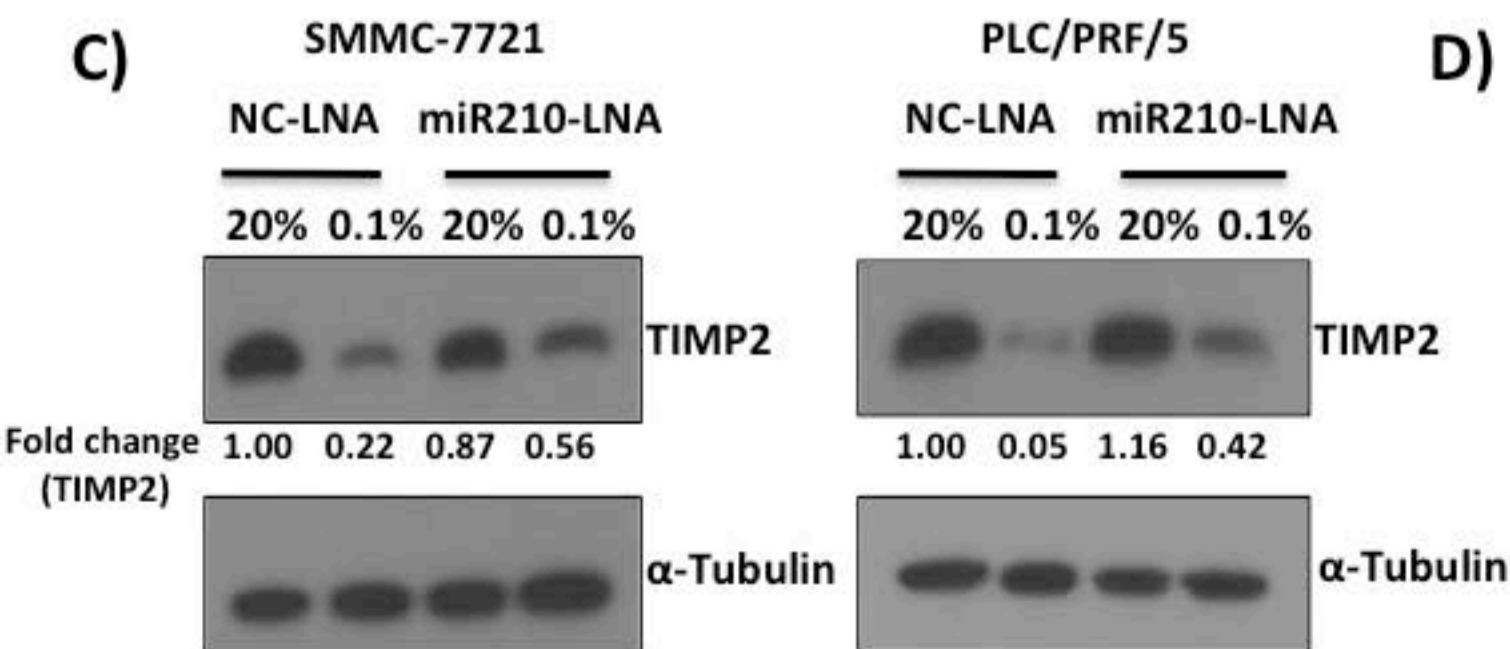

**D)**

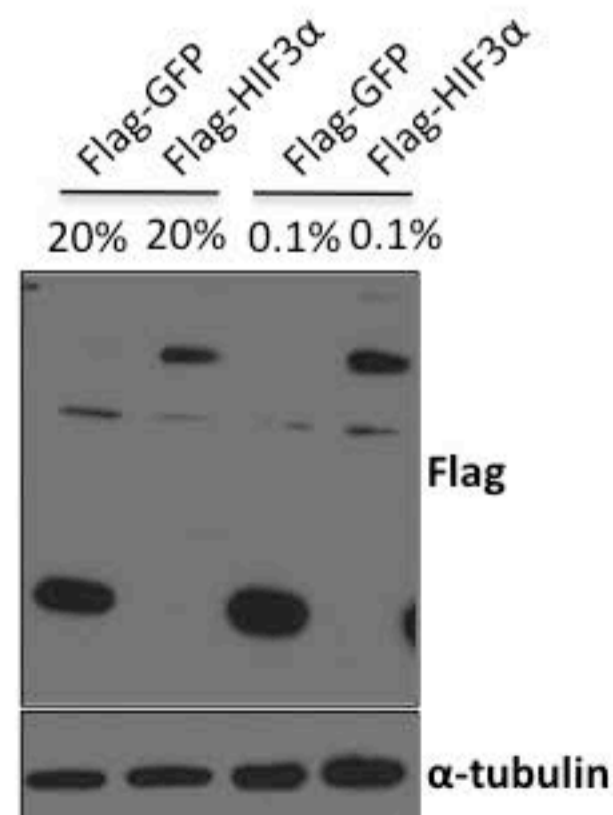



# Supporting Figure 6

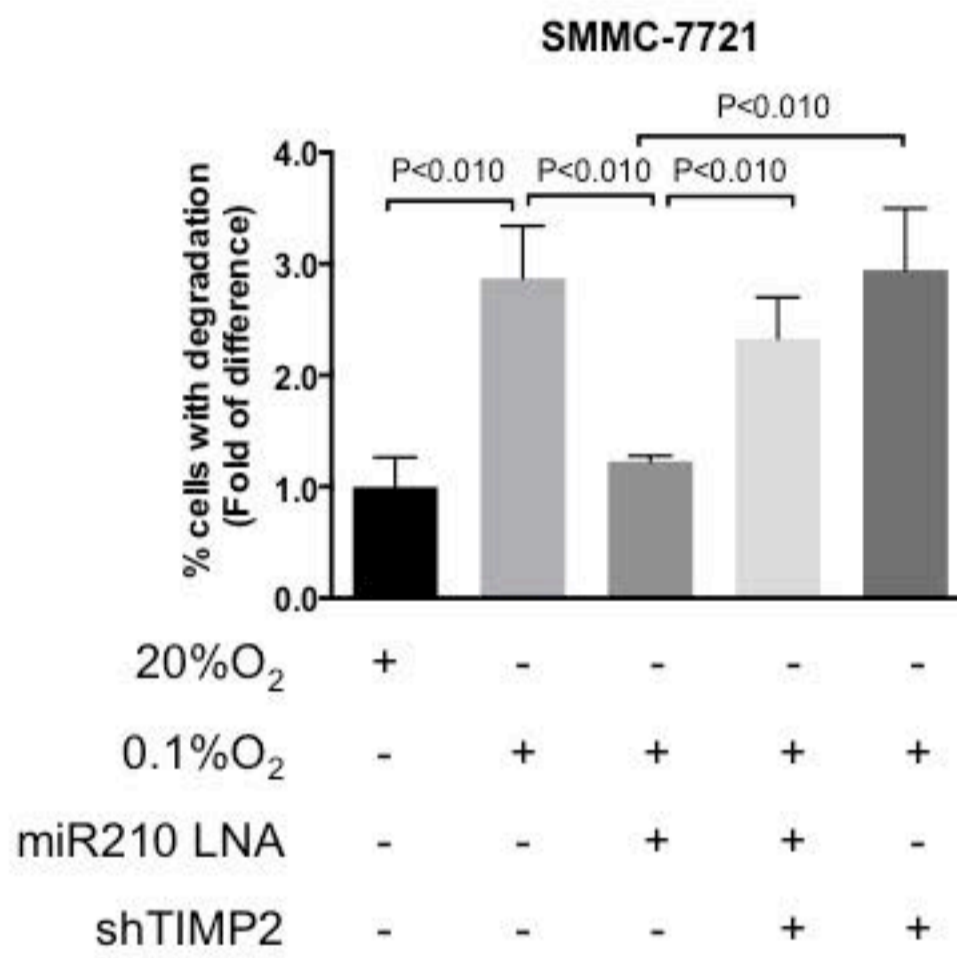

Supplement: HEP-64-473-s001.pdf [file HEP-64-473-s001.pdf]
